# Supplementary material for: Outbreak investigations of foot and mouth disease virus in Nepal between 2010 and 2015 in the context of historical serotype occurrence
Source: PubMed Central journal article supplement — Vet Med Sci. 2018 Sep 10;4(4):304–14. doi: 10.1002/vms3.120 (PMC6236139; doi:10.1002/vms3.120), 2018-09-10
Supplement: VMS3-4-304-s001.pdf [file VMS3-4-304-s001.pdf]

| Year         | No. Samples | Serotype   |           |           |           | NVD         |
|--------------|-------------|------------|-----------|-----------|-----------|-------------|
|              |             | O          | A         | C         | Asia 1    |             |
| 1965         | 2           | 2          | 0         | 0         | 0         | 0           |
| 1966         | 3           | 3          | 0         | 0         | 0         | 0           |
| 1967         | 5           | 0          | 4         | 0         | 0         | 1           |
| 1968         | 3           | 1          | 1         | 0         | 0         | 1           |
| 1975         | 6           | 3          | 0         | 0         | 0         | 3           |
| 1978         | 1           | 1          | 0         | 0         | 0         | 0           |
| 1983         | 7           | 5          | 1         | 0         | 0         | 1           |
| 1984         | 40          | 12         | 8         | 0         | 7         | 13          |
| 1985         | 68          | 37         | 0         | 0         | 7         | 24          |
| 1986         | 31          | 10         | 3         | 0         | 0         | 18          |
| 1987         | 54          | 19         | 0         | 0         | 6         | 29          |
| 1988         | 113         | 25         | 5         | 0         | 6         | 77          |
| 1989         | 53          | 13         | 3         | 0         | 8         | 29          |
| 1990         | 80          | 41         | 0         | 2         | 2         | 35          |
| 1991         | 10          | 5          | 0         | 0         | 0         | 5           |
| 1992         | 5           | 2          | 0         | 1         | 0         | 2           |
| 1993         | 74          | 8          | 0         | 9         | 0         | 57          |
| 1994         | 64          | 9          | 0         | 1         | 8         | 46          |
| 1995         | 51          | 3          | 0         | 0         | 7         | 41          |
| 1996         | 100         | 30         | 4         | 1         | 0         | 65          |
| 1997         | 100         | 9          | 0         | 0         | 13        | 78          |
| 1998         | 18          | 11         | 2         | 0         | 0         | 5           |
| 1999         | 12          | 7          | 0         | 0         | 0         | 5           |
| 2000         | 20          | 4          | 0         | 0         | 0         | 16          |
| 2001         | 95          | 29         | 0         | 0         | 4         | 62          |
| 2002         | 66          | 10         | 4         | 0         | 4         | 48          |
| 2003         | 123         | 19         | 9         | 0         | 0         | 95          |
| 2004         | 100         | 23         | 3         | 0         | 9         | 65          |
| 2005         | 107         | 5          | 0         | 0         | 0         | 102         |
| 2006         | 100         | 20         | 2         | 0         | 2         | 76          |
| 2007         | 129         | 20         | 0         | 0         | 2         | 107         |
| 2008         | 147         | 24         | 0         | 0         | 0         | 123         |
| 2009         | 174         | 29         | 1         | 0         | 2         | 142         |
| 2010         | 101         | 13         | 0         | 0         | 2         | 86          |
| 2011         | 102         | 15         | 0         | 0         | 0         | 87          |
| 2012         | 132         | 42         | 0         | 0         | 0         | 90          |
| 2013         | 224         | 65         | 0         | 0         | 0         | 159         |
| 2014         | 102         | 21         | 0         | 0         | 0         | 81          |
| 2015         | 131         | 61         | 0         | 0         | 0         | 70          |
| <b>Total</b> | <b>2753</b> | <b>656</b> | <b>50</b> | <b>14</b> | <b>89</b> | <b>1944</b> |
